# Supplementary material
Source: PubMed Central journal article supplement (PMC5734878)
Supplement: jcsm.14.1.101s1.pdf [file jcsm.14.1.101s1.pdf]

# CPAP Comfort Questionnaire

Please fill in the following details:

**Name:** \_\_\_\_\_ **Date:** \_\_\_\_\_

**Current Mask:** nasal mask / nasal mask with chinstrap / oro-nasal mask (*please circle one*)

This is a list of problems people may experience when using CPAP. Please read the list and tick the box which describes if each item has been a problem for you during the last four weeks.

| Problem                                                                          | Yes | No |
|----------------------------------------------------------------------------------|-----|----|
| 1. Facial soreness from mask pressure                                            |     |    |
| 2. Skin irritation from the mask                                                 |     |    |
| 3. Trouble keeping the mask in place                                             |     |    |
| 4. Air leaks from the mask                                                       |     |    |
| 5. Difficulty putting the mask on                                                |     |    |
| 6. Claustrophobia from the mask                                                  |     |    |
| 7. Dry mouth or throat                                                           |     |    |
| 8. Dry or blocked nose                                                           |     |    |
| 9. Difficulty breathing out                                                      |     |    |
| 10. Sore eyes due to CPAP use                                                    |     |    |
| 11. Noisy CPAP mask                                                              |     |    |
| 12. If you had a CPAP mask problem not included on this list please describe it. |     |    |
|                                                                                  |     |    |
|                                                                                  |     |    |
|                                                                                  |     |    |

The following questions relate to your CPAP use during the last four weeks. Please place a mark across the line for each question to indicate your answer.

**0 is the worst possible level, and 10 is the best possible level.**

13. How satisfied were you with the mask?

\_\_\_\_\_

0 10

14. How refreshed did you feel after waking in the morning?

\_\_\_\_\_

0 10

15. How restful was your sleep?

\_\_\_\_\_

0 10
